# Supplementary material for: Exosomes derived from gefitinib-treated EGFR-mutant lung cancer cells alter cisplatin sensitivity via up-regulating autophagy
Source: PubMed Central journal article supplement (PMC5029725; doi:10.18632/oncotarget.8358), 2016-03-25
Supplement: oncotarget-07-24585-s001.pdf [file oncotarget-07-24585-s001.pdf]

## Exosomes derived from gefitinib-treated EGFR-mutant lung cancer cells alter cisplatin sensitivity via up-regulating autophagy

### Supplementary Materials

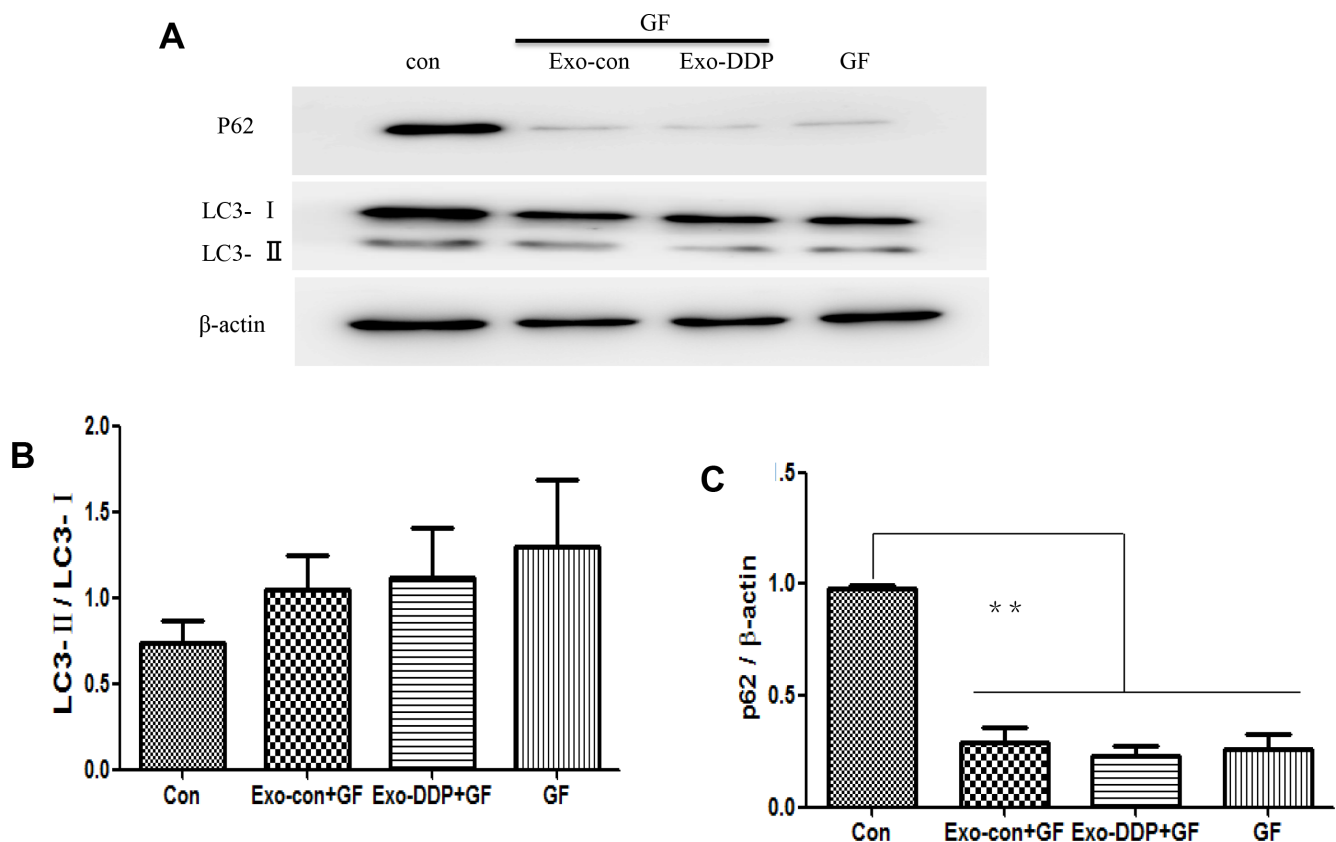

**Supplementary Figure S1: Exo-DDP did not significantly impact gefitinib-induced autophagy.** The impact of Exo-DDP on gefitinib-induced autophagy was investigated using western blots (A), semi-quantitative analysis of LC3-II conversion (B) and P62 degradation (C) using Scion Image software 4.0.3.2. Data are presented as the mean  $\pm$  SD (error bar) of at least three independent experiments. \*and \*\*represent  $P < 0.05$  and  $P < 0.01$ , respectively.

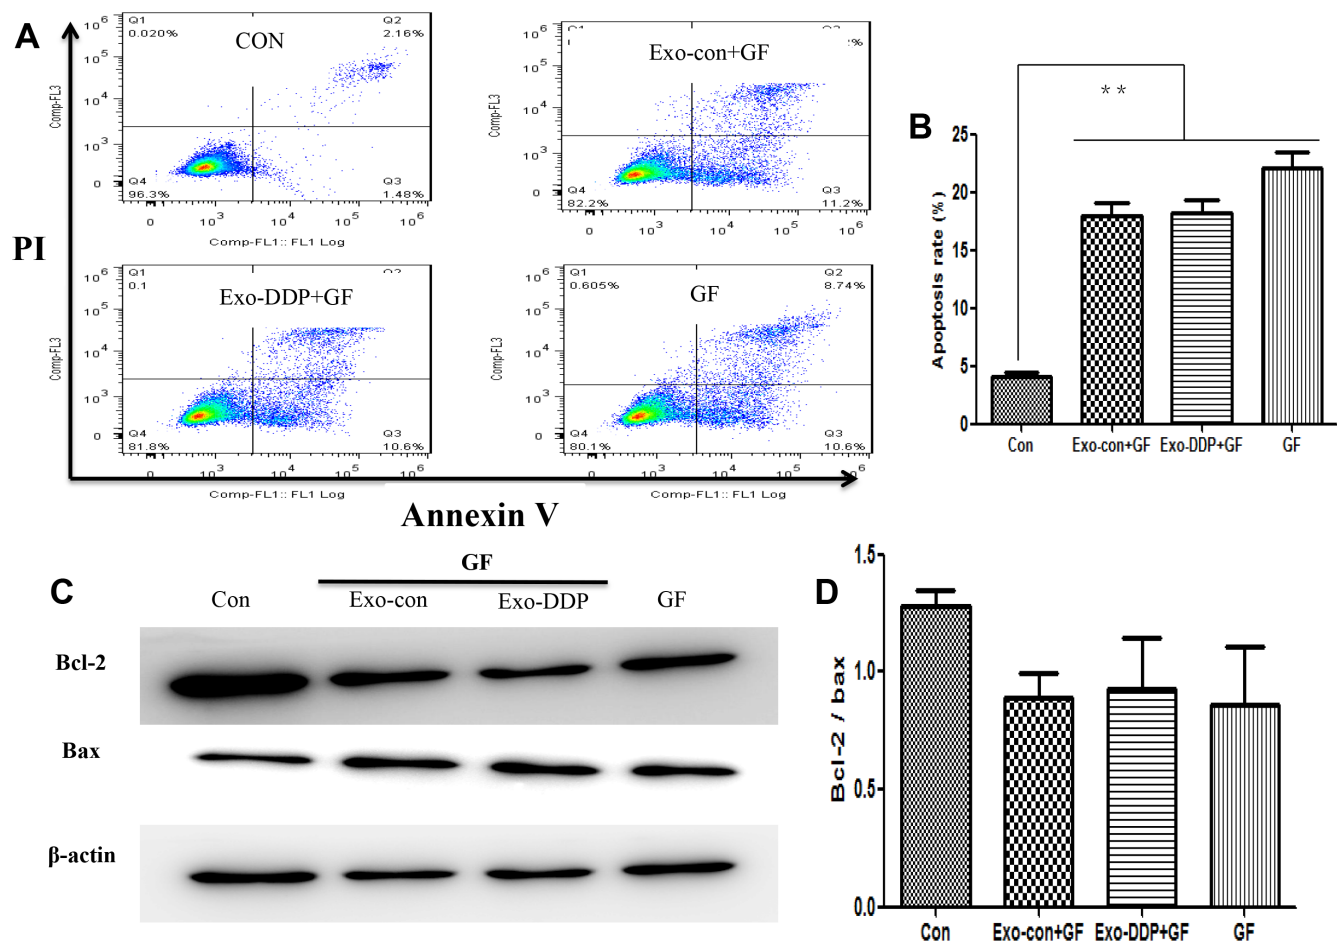

**Supplementary Figure S2: Exosomes derived from cisplatin-treated PC9 cells did not significantly impact gefitinib-induced apoptosis.** PC9 cells were pre-incubated with 10  $\mu$ g/ml of Exo-Con or Exo-DDP for 24 hours and co-cultured with 1  $\mu$ M gefitinib for another 24 hours. Apoptotic cells were detected by FCM assay using an Annexin V-FITC/PI double-staining apoptosis detection kit (A) and statistically analyzed (B). The expression levels of Bcl2 and Bax proteins were measured by western blotting (C) and semi-quantified using Scion Image software 4.0.3.2 (D). Data are presented as the mean  $\pm$  SD (error bar) of at least three independent experiments. \*\*represents  $P < 0.01$  for the indicated groups.
